# Supplementary material for: Investigating genetically mimicked effects of statins via HMGCR inhibition on immune-related diseases in men and women using Mendelian randomization
Source: PubMed Central journal article supplement (PMC8642420; doi:10.1038/s41598-021-02981-x), 2021-12-03
Supplement: 41598_2021_2981_MOESM1_ESM.pdf [file 41598_2021_2981_MOESM1_ESM.pdf]

■ Europeans ◆ East Asians ● Meta-analysis

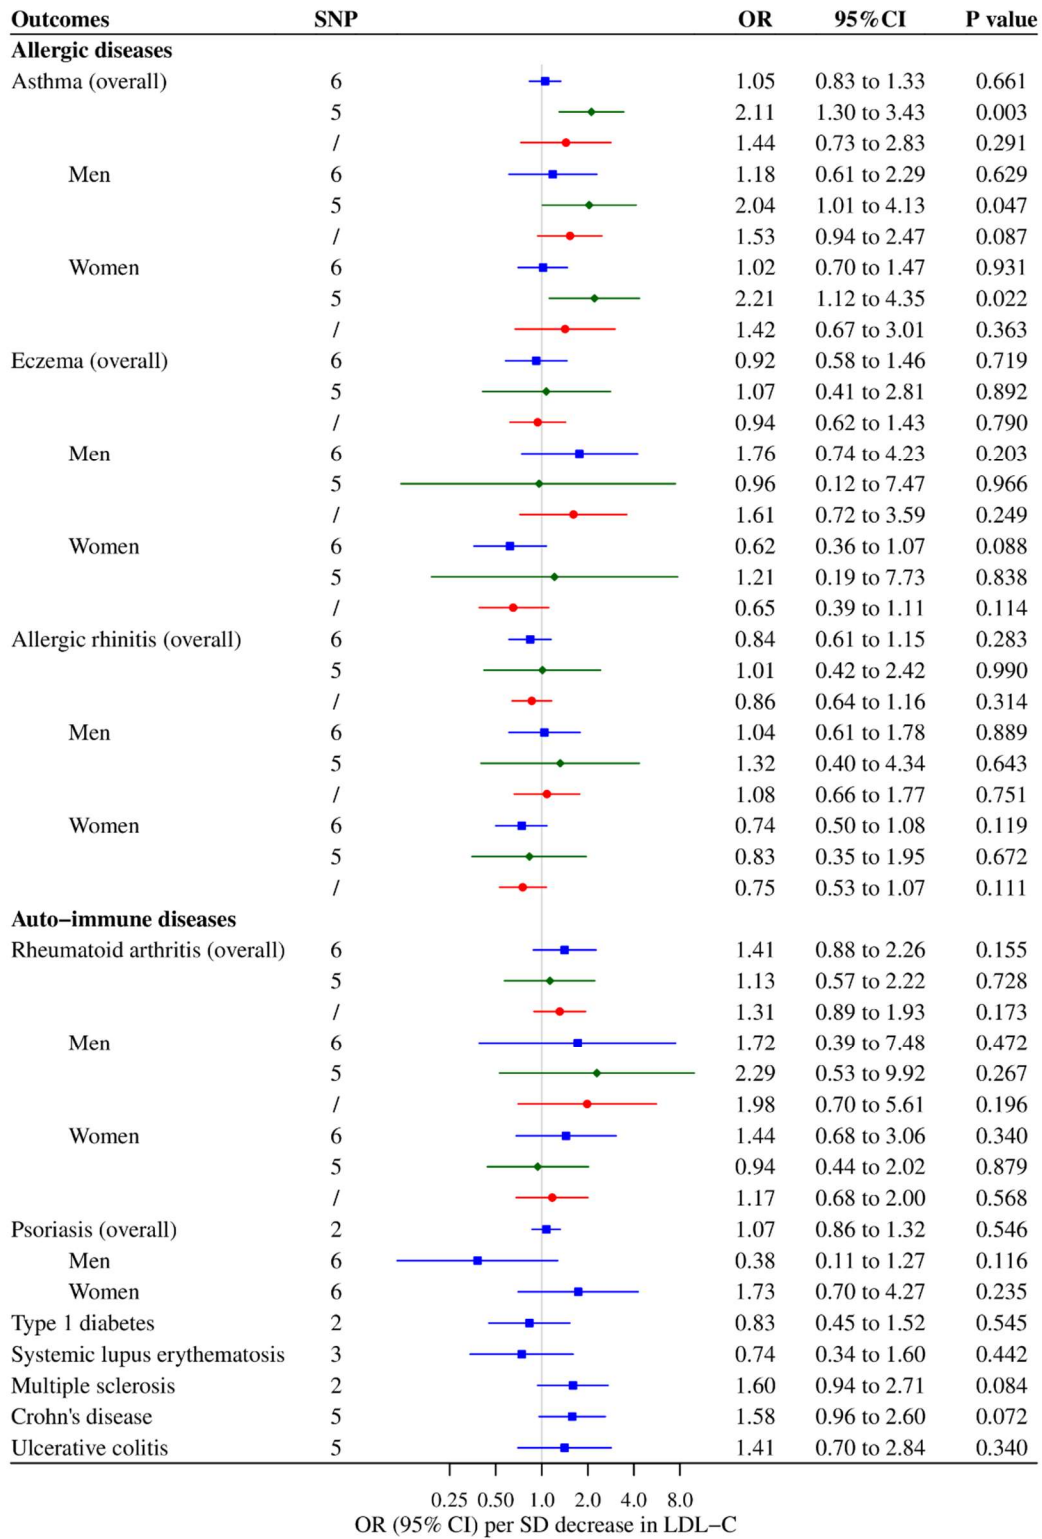

Supplemental Fig. S1. Sensitivity analysis of genetically mimicked effects of statins via HMGCR inhibition on allergic and auto-immune diseases.

HMGCR, 3-hydroxy-3-methylglutaryl-coenzyme A reductase; OR, odds ratio; CI, confidence interval; SD, standard deviation; LDL-C, low-density lipoprotein cholesterol. All correlated SNPs and their correlations were included in the analysis using inverse variance weighted (IVW) method. The unit of LDL-C reduction is approximately 0.87 mmol/L in Europeans and 1.06 mmol/L in East Asians.

Supplemental Table S1. Associations of SNPs mimicking statins via HMGCR inhibition with LDL-C from the UK Biobank and Biobank Japan.

| Population | Source        | Sex        | SNP        | Effect allele | Beta   | SE     | P-value   | F-statistics |       |
|------------|---------------|------------|------------|---------------|--------|--------|-----------|--------------|-------|
| European   | UK Biobank    | Overall    | rs12916    | C             | 0.0614 | 0.0024 | 4.32E-144 | 653.9        |       |
|            |               |            | rs10066707 | A             | 0.0404 | 0.0024 | 3.33E-61  | 272.5        |       |
|            |               |            | rs17238484 | T             | 0.0508 | 0.0028 | 7.42E-73  | 326.1        |       |
|            |               |            | rs2006760  | G             | 0.0347 | 0.0030 | 1.12E-31  | 137.2        |       |
|            |               |            | rs2303152  | A             | 0.0316 | 0.0039 | 8.54E-16  | 64.7         |       |
|            | UK Biobank    | Men        | rs5909     | A             | 0.0480 | 0.0040 | 1.99E-32  | 140.6        |       |
|            |               |            | rs12916    | C             | 0.0527 | 0.0036 | 2.45E-49  | 218.2        |       |
|            |               |            | rs10066707 | A             | 0.0363 | 0.0036 | 1.68E-23  | 99.8         |       |
|            |               |            | rs17238484 | T             | 0.0444 | 0.0042 | 2.44E-26  | 112.8        |       |
|            |               |            | rs2006760  | G             | 0.0302 | 0.0044 | 7.08E-12  | 47.0         |       |
|            |               | UK Biobank | Women      | rs2303152     | A      | 0.0294 | 0.0058    | 4.33E-07     | 25.5  |
|            |               |            |            | rs5909        | A      | 0.0391 | 0.0060    | 8.37E-11     | 42.2  |
|            |               |            |            | rs12916       | C      | 0.0695 | 0.0033    | 3.25E-100    | 452.2 |
|            |               |            |            | rs10066707    | A      | 0.0442 | 0.0033    | 4.19E-40     | 175.8 |
|            |               |            |            | rs17238484    | T      | 0.0568 | 0.0038    | 6.97E-50     | 220.6 |
| East Asian | Biobank Japan | Overall    | rs2006760  | G             | 0.0390 | 0.0040 | 3.51E-22  | 93.8         |       |
|            |               |            | rs2303152  | A             | 0.0342 | 0.0053 | 1.67E-10  | 40.8         |       |
|            |               |            | rs5909     | A             | 0.0561 | 0.0055 | 2.68E-24  | 103.5        |       |
|            |               |            | rs12916    | C             | 0.0584 | 0.0052 | 1.91E-29  | 127.0        |       |
|            |               |            | rs10066707 | A             | 0.0293 | 0.0054 | 4.85E-08  | 29.8         |       |
|            |               |            | rs17238484 | T             | 0.0553 | 0.0055 | 4.82E-24  | 102.3        |       |
|            |               |            | rs2303152  | A             | 0.0403 | 0.0100 | 5.20E-05  | 16.4         |       |
|            |               |            | rs5909     | A             | 0.0811 | 0.0224 | 2.96E-04  | 13.1         |       |

HMGCR, 3-hydroxy-3-methylglutaryl-coenzyme A reductase; LDL-C, low-density lipoprotein cholesterol.

Supplemental Table S2. Information about genome-wide association studies involved.

| Population         | Outcomes                     | Sex     | No. of cases | No. of controls | Beta transformation          | Data source                        |
|--------------------|------------------------------|---------|--------------|-----------------|------------------------------|------------------------------------|
| European           | Asthma                       | Overall | 64538        | 329321          | No                           | Han Y (PMID: 32296059)             |
|                    |                              | Men     | 17973        | 149015          | Yes                          | UK Biobank (Neale Lab)             |
|                    |                              | Women   | 23961        | 170192          | Yes                          | UK Biobank (Neale Lab)             |
|                    | Eczema                       | Overall | 9321         | 351820          | Yes                          | UK Biobank (Neale Lab)             |
|                    |                              | Men     | 4255         | 162733          | Yes                          | UK Biobank (Neale Lab)             |
|                    |                              | Women   | 5066         | 189087          | Yes                          | UK Biobank (Neale Lab)             |
|                    | Allergic rhinitis            | Overall | 20667        | 340474          | Yes                          | UK Biobank (Neale Lab)             |
|                    |                              | Men     | 9704         | 157284          | Yes                          | UK Biobank (Neale Lab)             |
|                    |                              | Women   | 10963        | 183190          | Yes                          | UK Biobank (Neale Lab)             |
|                    | Rheumatoid arthritis         | Overall | 14361        | 43923           | No                           | Okada Y (PMID: 24390342)           |
|                    |                              | Men     | 1259         | 165729          | Yes                          | UK Biobank (Neale Lab)             |
|                    |                              | Women   | 2758         | 191395          | Yes                          | UK Biobank (Neale Lab)             |
|                    | Psoriasis                    | Overall | 10588        | 22806           | No                           | Lam C Tsoi (PMID: 23143594)        |
|                    |                              | Men     | 2268         | 164720          | Yes                          | UK Biobank (Neale Lab)             |
|                    |                              | Women   | 1924         | 192229          | Yes                          | UK Biobank (Neale Lab)             |
|                    | Type 1 diabetes              | Overall | 12079        | 12262           | No                           | Onengut-Gumuscu S (PMID: 25751624) |
|                    | Systemic lupus erythematosus | Overall | 7219         | 15991           | No                           | Bentham J (PMID: 26502338)         |
|                    | Multiple sclerosis           | Overall | 14498        | 24091           | No                           | Beecham AH (PMID: 24076602)        |
|                    | Crohn's disease              | Overall | 12194        | 28072           | No                           | de Lange KM (PMID: 28067908)       |
| Ulcerative colitis | Overall                      | 12366   | 33609        | No              | de Lange KM (PMID: 28067908) |                                    |
| East Asian         | Asthma                       | Overall | 8216         | 201592          | No                           | Biobank Japan                      |
|                    |                              | Men     | 3932         | 103089          | No                           | Biobank Japan                      |
|                    |                              | Women   | 4284         | 98503           | No                           | Biobank Japan                      |
|                    | Eczema                       | Overall | 2385         | 209651          | No                           | Biobank Japan                      |
|                    |                              | Men     | 1262         | 107862          | No                           | Biobank Japan                      |
|                    |                              | Women   | 1123         | 101789          | No                           | Biobank Japan                      |
|                    | Allergic rhinitis            | Overall | 5746         | 206707          | No                           | Biobank Japan                      |
|                    |                              | Men     | 2460         | 106887          | No                           | Biobank Japan                      |
|                    |                              | Women   | 3286         | 99820           | No                           | Biobank Japan                      |
|                    | Rheumatoid arthritis         | Overall | 4199         | 208254          | No                           | Biobank Japan                      |
|                    |                              | Men     | 874          | 108473          | No                           | Biobank Japan                      |
|                    |                              | Women   | 3325         | 99781           | No                           | Biobank Japan                      |
